# Supplementary material
Source: publisher figshare collection journal article supplement (https://frontiersin.figshare.com/ndownloader/files/18038897)
Supplement: Supplementary file [file 18038897]

1

**Supplemental Table: Additional pathogenic variants and variant of unknown clinical significance identified with the HHA panel**

| Patient | Gene          | Refseq and variant       | Amino acid change | Zygosity | Interpretation                      | HGMD         | ClinVar          | gnomAD-All | in silico prediction                             |
|---------|---------------|--------------------------|-------------------|----------|-------------------------------------|--------------|------------------|------------|--------------------------------------------------|
| 2       | <i>KLF1</i>   | NM_006563.3:c.604G>A     | p.Gly202Arg       | het      | VUCS                                | not reported | not reported     | 0.0064%    | pathogenic                                       |
|         | <i>PKLR</i>   | NM_000298.5:c.1456C>T    | p.Arg486Trp       | het      | likely pathogenic                   | DM           | path/likely path | 0.2900%    | pathogenic                                       |
|         | <i>SPTA1</i>  | NM_003126.3:c.803G>A     | p.Arg268Gln       | het      | VUCS                                | not reported | not reported     | 0.0007%    | conflicted                                       |
| 8       | <i>G6PD</i>   | NM_001042351.2:c.844G>C  | p.Asp282His       | hemi     | Pathogenic (class III G6PD variant) |              | pathogenic       |            |                                                  |
| 10      | <i>PIEZO1</i> | NM_001142864.2:c.4674C>T | p.Gly1558Gly      | HET      |                                     | not reported | not reported     | 0.0330%    | not predicted to create or disrupt a splice site |
| 11      | <i>ABCG5</i>  | NM_022436.2:c.1535T>C    | p.Ile512Thr       | HET      | VUCS                                | not reported | not reported     | 0.0028%    | conflicted                                       |
|         | <i>ABCG5</i>  | NM_022436.2:c.969G>T     | p.Gln323His       | HET      | VUCS                                | not reported | not reported     | 0.0004%    | benign                                           |
|         | <i>EPB42</i>  | NM_000119.2:c.520+12C>T  |                   | HET      | VUCS-LB                             | not reported | VUS              | 0.1400%    | not predicted to create or disrupt a splice site |
|         | <i>PIEZO1</i> | NM_001142864.2:c.1356C>G | p.Leu452Leu       | HET      | VUCS                                | not reported | not reported     | NA         | not predicted to create or disrupt a splice site |
|         | <i>SEC23B</i> | NM_006363.4:c.2202T>C    | p.Tyr734Tyr       | HET      | VUCS                                | not reported | not reported     | NA         | may disrupt a splice donor                       |

2

3
